# Supplementary material
Source: ML conference proceedings conference paper supplement (https://proceedings.neurips.cc/paper_files/paper/2019/hash/ba6d843eb4251a4526ce65d1807a9309-Abstract.html)
Supplement: Supplementary file [file ba6d843eb4251a4526ce65d1807a9309-Supplemental.zip]

---

# Tight Dimensionality Reduction for Sketching Low Degree Polynomial Kernels

---

Anonymous Author(s)

Affiliation

Address

email

## Abstract

We revisit the classic randomized sketch of a tensor product of  $q$  vectors  $x_i \in \mathbb{R}^n$ . The  $i$ -th coordinate  $(Sx)_i$  of the sketch is equal to  $\prod_{j=1}^q \langle u^{i,j}, x^j \rangle / \sqrt{m}$ , where  $u^{i,j}$  are independent random sign vectors. Kar and Karnick (JMLR, 2012) show that if the sketching dimension  $m = \Omega(\epsilon^{-2} C_\Omega^2 \log(1/\delta))$ , where  $C_\Omega$  is a certain property of the point set  $\Omega$  one wants to sketch, then with probability  $1 - \delta$ ,  $\|Sx\|_2 = (1 \pm \epsilon)\|x\|_2$  for all  $x \in \Omega$ . However, in their analysis  $C_\Omega^2$  can be as large as  $\Theta(n^{2q})$ , even for a set  $\Omega$  of  $O(1)$  vectors  $x$ .

We give a new analysis of this sketch, providing nearly optimal bounds. Namely, we show an upper bound of  $m = \Theta(\epsilon^{-2} \log(n/\delta) + \epsilon^{-1} \log^q(n/\delta))$ , which by composing with CountSketch, can be improved to  $\Theta(\epsilon^{-2} \log(1/(\delta\epsilon)) + \epsilon^{-1} \log^q(1/(\delta\epsilon)))$ . For the important case of  $q = 2$  and  $\delta = 1/\text{poly}(n)$ , this shows that  $m = \Theta(\epsilon^{-2} \log(n) + \epsilon^{-1} \log^2(n))$ , demonstrating that the  $\epsilon^{-2}$  and  $\log^2(n)$  terms do not multiply each other. We also show a nearly matching lower bound of  $m = \Omega(\epsilon^{-2} \log(1/(\delta)) + \epsilon^{-1} \log^q(1/(\delta)))$ . In a number of applications, one has  $|\Omega| = \text{poly}(n)$  and in this case our bounds are optimal up to a constant factor. This is the first high probability sketch for tensor products that has optimal sketch size and can be implemented in  $m \cdot \sum_{i=1}^q \text{nnz}(x_i)$  time, where  $\text{nnz}(x_i)$  is the number of non-zero entries of  $x_i$ .

Lastly, we empirically compare our sketch to other sketches for tensor products, and give a novel application to compressing neural networks.

## 1 Introduction

Dimensionality reduction, or *sketching*, is a way of embedding high-dimensional data into a low-dimensional space, while approximately preserving distances between data points. The embedded data is often easier to store and manipulate, and typically results in much faster algorithms. Therefore, it is often beneficial to sketch a dataset first and then run machine learning algorithms on the sketched data. This technique has been applied to numerical linear algebra problems [36], classification [8, 9], data stream algorithms [32], nearest neighbor search [21], sparse recovery [11, 19], and numerous other problems.

While effective, in many modern machine learning problems the points one would like to embed are often only specified implicitly. Kernel machines, such as support vector machines, are one example, for which one first non-linearly transforms the input points before running an algorithm. Such machines are much more powerful than their linear counterparts, as they can approximate any function or decision boundary arbitrarily well with enough training data. In kernel applications there is a feature map  $\phi : \mathbb{R}^n \rightarrow \mathbb{R}^{n'}$  which maps inputs in  $\mathbb{R}^n$  to a typically much higher  $n'$ -dimensional space, with the important property that for  $x, y \in \mathbb{R}^n$ , one can typically quickly compute

36  $\langle \phi(x), \phi(y) \rangle$  given only  $\langle x, y \rangle$ . As many applications only depend on the geometry of the input  
 37 points, or equivalently inner product information, this allows one to work in the potentially much  
 38 higher and richer  $n'$ -dimensional space while running in time proportional to that of the smaller  
 39  $n$ -dimensional space. Here often one would like to sketch the  $n'$ -dimensional points  $\phi(x)$ , without  
 40 explicitly computing  $\phi(x)$  and then applying the sketch, as this would be too slow.

41 A specific example is the polynomial kernel of degree  $q$ , for which  $n' = n^q$  and  $\phi(x)_{i_1, i_2, \dots, i_q} =$   
 42  $x_{i_1} \cdot x_{i_2} \cdots x_{i_q}$ . The polynomial kernel is also often used for approximating more general functions  
 43 via Taylor expansion [16, 29]. Note that the polynomial kernel  $\phi(x)$  can be written as a special type  
 44 of tensor product,  $\phi(x) = x \otimes x \otimes \cdots \otimes x$ , where  $\phi(x)$  is the tensor product of  $x$  with itself  $q$  times.

45 In this work we explore the more *general* problem of sketching a tensor product of arbitrary vectors  
 46  $x^1, \dots, x^q \in \mathbb{R}^n$  with the goal of embedding polynomial kernels. We will focus on the typical case  
 47 when  $q$  is an absolute constant independent of  $n$ . In this problem we would like to quickly compute  
 48  $S \cdot x$ , where  $x = x^1 \otimes x^2 \otimes \cdots \otimes x^q$ , where  $S$  is a sketching matrix with a small number  $m$  of rows,  
 49 which corresponds to the embedding dimension.

50 The most naïve solution would be to explicitly compute  $x$  and then apply an off-the-shelf Johnson  
 51 Lindenstrauss transform  $S$  [24, 17, 27, 15], which using the best known bounds gives an embedding  
 52 dimension of  $m = \Theta(\epsilon^{-2} \log(1/\delta))$ , which is optimal [23, 26, 30]. However, the running time  
 53 is prohibitive, since it is at least the number  $\text{nnz}(x)$  of non-zeros of  $x$ , which can be as large as  
 54  $n^q$ . A much more practical alternative is TENSORSKETCH [33, 34] which gives a running time of  
 55  $\sum_{i=1}^q \text{nnz}(x^i)$ , which is optimal, but the embedding dimension is a prohibitive  $\Theta(\epsilon^{-2}/\delta)$ . Note that  
 56 for high probability applications, where one may want to set  $\delta = 1/\text{poly}(n)$ , this gives an embedding  
 57 dimension as large as  $\text{poly}(n)$ , which since  $x$  has length  $n^q = \text{poly}(n)$ , may defeat the purpose of  
 58 dimensionality reduction.

59 Thus, we are at a crossroads; on the one hand we have a sketch with the optimal embedding dimension  
 60 with a prohibitive running time, and on the other hand we have a sketch with the optimal running  
 61 time but with a prohibitive embedding dimension. A natural question is if there is another sketch  
 62 which achieves both a small embedding dimension and enjoys a fast running time.

## 63 1.1 Our Contributions

### 64 1.1.1 Near-Optimal Analysis of Tensorized Random Projection Sketch

65 Our first contribution shows that a previously analyzed sketch by Kar and Karnick for tensor products  
 66 [29], referred here to as a Tensorized Random Projection, has *exponentially better* embedding  
 67 dimension than previously known. Given vectors  $x^1, \dots, x^q \in \mathbb{R}^n$  in this sketch one computes the  
 68 sketch  $S \cdot x$  of the tensor product  $x = x^1 \otimes x^2 \otimes \cdots \otimes x^q$  where the  $i$ -th coordinate  $(Sx)_i$  of the  
 69 sketch is equal to  $\frac{1}{\sqrt{m}} \cdot \prod_{j=1}^q \langle u^{i,j}, x^j \rangle$ . Here the  $u^{i,j} \in \{-1, 1\}^n$  are independent random sign  
 70 vectors, and  $q$  is typically a constant. The previous analysis of this sketch in [34] describes the sketch  
 71 as having large variance and requires a sketching dimension that grows as  $n^{2q}$ , as detailed in the  
 72 supplementary, in Appendix D.

We give a much improved analysis of this sketch in 2.1, showing that for any  $x, y \in \mathbb{R}^{n^q}$  and  
 $\delta < 1/n^q$ , there is an  $m = \Theta(\epsilon^{-2} \log(n/\delta) + \epsilon^{-1} \log^q(n/\delta))$  for which

$$\Pr[|\langle Sx, Sy \rangle - \langle x, y \rangle| > \epsilon] \leq \delta.$$

73 Notably our dimension bound grows as  $\log^q(n)$  rather than  $n^{2q}$ , providing an exponential improve-  
 74 ment over previous analyses of this sketch. Another interesting aspect of our bound is that the second  
 75 term only depends *linearly* on  $\epsilon^{-1}$ , rather than quadratically. This can represent a substantial savings  
 76 for small  $\epsilon$ , e.g., if  $\epsilon = .001$ . Thus, for example, if  $\epsilon \leq 1/\log^{q-1}(n)$ , our sketch size is  $\Theta(\epsilon^{-2} \log(n))$   
 77 which is optimal for any possibly adaptive and possibly non-linear sketch, in light of lower bounds for  
 78 arbitrary Johnson-Lindenstrauss transforms [30]. Thus, at least for this natural setting of parameters,  
 79 this sketch *does not incur very large variance*, contrary to the beliefs stated above. Moreover,  $q = 2$   
 80 is one of the most common settings for the polynomial kernel in natural language processing [2],  
 81 since larger degrees tend to overfit. In this case, our bound is  $m = \Theta(\epsilon^{-2} \log(n) + \epsilon^{-1} \log^2(n))$ ,  
 82 and the separation of the  $\epsilon^{-2}$  and  $\log^2(n)$  terms in our sketching dimension is especially significant.

83 We next show in 2.2 that a simple composition of the Tensorized Random Projection with a *CountS-*  
 84 *sketch* [13] slightly improves the embedding dimension to  $m = \Theta(\epsilon^{-2} \log(1/(\delta\epsilon)) + \epsilon^{-1} \log^q(1/(\delta\epsilon)))$

and works for all  $\delta < 1$ . Moreover, we can compute the entire sketch (including the composition with CountSketch) in time  $O(\sum_{i=1}^q m \cdot \text{nnz}(x^i))$ . This makes our sketch a "best of both worlds" in comparison to the Johnson-Lindenstrauss transform and TensorSketch: Tensorized Random Projection runs much faster than the Johnson-Lindenstrauss transform and it enjoys a smaller embedding dimension than TensorSketch. Additionally, we are able to show a nearly matching  $m = \Omega(\varepsilon^{-2} \log(1/\delta) + \varepsilon^{-1} \log^q(1/\delta))$  lower bound for this sketch, by exhibiting an input  $x$  for which  $\|Sx\|_2 \notin (1 \pm \epsilon)\|x\|_2$  with probability more than  $\delta$ .

It is also worthwhile to contrast our results with earlier work in the data streaming community [22, 10] that analyzed the variance only for  $q = 2$  and general  $q$  respectively, and then achieved high probability bounds by taking the median of multiple independent copies of  $S$ . The non-linear median operation makes the former constructs unsuitable for machine learning applications. In contrast, we show high probability bounds for the *linear* embedding  $S$  directly. From personal communication we are aware of parallel independent work in unpublished manuscripts [4, 28], which provide different sketches with different trade-offs. Their sketching dimension has significantly worse dependence on  $\epsilon$  and  $\delta$  and better (polynomial) dependence on  $q$ , making it more suitable for approximating high-degree polynomial kernels.

From a technical standpoint, our work builds off the recent proof of the Johnson-Lindenstrauss transform in [15]. We write the sketch  $S$  as  $\sigma^T A \sigma$ , where in our setting  $\sigma$  corresponds to the concatenation of  $u^{1,1}, u^{2,1}, \dots, u^{m,1}$ , while  $A$  is a random matrix which depends on all of  $u^{1,j}, u^{2,j}, \dots, u^{m,j}$  for  $j = 2, 3, \dots, q$ . Following the proof in [15], we then apply the Hanson-Wright inequality to upper bound the  $w$ -th moment  $\mathbf{E}[|\sigma^T A \sigma - \mathbf{E}[\sigma^T A \sigma]|^w]$ , for integers  $w$ , in terms of the Frobenius norm  $\|A\|_F$  and operator norm  $\|A\|_2$  of the matrix  $A$ . The main twist here is that in the tensor setting, when we try to apply this inequality, the *matrix*  $A$  is a *random variable itself*. Bounding  $\|A\|_2$  can be accomplished by essentially viewing  $A$  as a  $(q - 1)$ -th order tensor, flattening it  $q - 1$  times, and applying Khintchine's inequality each time. The more complicated part of the argument is in bounding  $\|A\|_F$ , which again involves an inductive argument to obtain tail bounds on the Frobenius norm of each of the blocks of  $A$ , which itself is a block-diagonal matrix with  $m$  blocks. The tail bounds are not as strong as sub-Gaussian or even sub-exponential random variables, which makes standard analyses based on moment generating functions inapplicable. We instead give a "level-set" argument by giving a novel adaptation of analyses of Tao, originally needed for showing concentration of  $p$ -norms for  $0 < p < 1$ , to our tensor setting (see, e.g., Proposition 6 in [35]).

## 1.1.2 Approximating Polynomial Kernels

Replicating experiments from [34], we approximate polynomial kernels using Tensorized Random Projection, TensorSketch, and Random Maclaurin [29] features. In Section 4.1 we demonstrate that TensorSketch always fails for certain sparse inputs, while Tensorized Random Projection succeeds with high probability. We show in 4.2 that Tensorized Random Projection has similar accuracy to TensorSketch, and both vastly outperform Random Maclaurin features.

## 1.1.3 Compressing Neural Networks

We also experiment with using Tensorized Random Projection to compress the layers of a neural network. In [7], Arora et al. propose a method for compressing the layers of a neural network via random projections and prove generalization bounds for such networks. To compress an individual layer, they choose a basis set of random Rademacher matrices and project the layer's weight matrix onto this random basis set. We refer to this method here as *Random Projection*. The simplest, order  $q = 2$ , Tensorized Random Projection can be viewed as a more efficient, rank-1 version of Random Projection: instead of using a basis set of fully-random Rademacher matrices, the basis set is made up of random rank-1 Rademacher matrices. We show in 4.3 that Tensorized Random Projection has similar test accuracy as Random Projection when compressing the top layer of a small neural network.

# 2 Main Theorem and its Proof

Our main theorem combining sketches  $S$  and  $T$  described in Sections 2.1 and 2.2 is the following. We provide its proof in Section 2.3.

**Theorem 2.1.** *There is an oblivious sketch  $S \cdot T : \mathbb{R}^{n^q} \rightarrow \mathbb{R}^m$  for  $m = \Theta(\epsilon^{-2} \log(1/(\epsilon\delta)) + \epsilon^{-1} \log^q(1/(\epsilon\delta)))$ , such that for any fixed vector  $x \in \mathbb{R}^{n^q}$  and constant  $q$ ,*

$$\Pr[\|STx\|_2^2 = (1 \pm \epsilon)\|x\|_2^2] \geq 1 - \delta,$$

where  $0 < \epsilon, \delta < 1$ . Further, if  $x$  has the form  $x = x^1 \otimes x^2 \otimes \dots \otimes x^q$  for vectors  $x^i \in \mathbb{R}^n$  for  $i = 1, 2, \dots, q$ , then the time to compute  $STx$  is  $O(\sum_{i=1}^q \text{nnz}(x^i)m)$ .

## 2.1 Initial Bound on Our Sketch Size

We are ready to present Tensorized Random Projection sketch  $S$  and the outermost layer of its analysis. We defer statements and proofs of some key technical lemmas to Appendix A in the supplementary. Note that both the sketching dimension  $m$  and the failure probability  $\delta$  depend on  $n$ , which we later eliminate with the help of Section B.

**Theorem 2.2.** *There is an oblivious sketch  $S : \mathbb{R}^{n^q} \rightarrow \mathbb{R}^m$  for  $m = \Theta(\epsilon^{-2} \log(n/\delta) + \epsilon^{-1} \log^q(n/\delta))$  and  $\delta < 1/n^q$  such that for any fixed vector  $x \in \mathbb{R}^{n^q}$ ,  $\Pr[\|Sx\|_2^2 = (1 \pm \epsilon)\|x\|_2^2] \geq 1 - \delta$ .*

*Proof.* Set  $m = \Theta(\epsilon^{-2} \log(n/\delta) + \epsilon^{-1} \log^q(n/\delta))$ , and define a family of sketching matrices  $S \in \mathbb{R}^{m \times n^q}$  as follows. Choose  $m \cdot q$  independent uniformly random vectors  $u^{i,j} \in \{+1, -1\}^n$ , where  $i = 1, \dots, m$  and  $j = 1, \dots, q$ . Then the  $\ell$ -th row of  $S$  is  $(1/\sqrt{m})u^{\ell,1} \otimes u^{\ell,2} \otimes \dots \otimes u^{\ell,q}$ , that is, the  $(i_1, i_2, \dots, i_q)$ -th entry of the  $\ell$ -th row of  $S$  is  $(1/\sqrt{m}) \prod_{j=1}^q u_{i_j}^{\ell,j}$ .

It suffices to show for any unit vector  $x \in \mathbb{R}^{n^q}$ , that

$$\Pr[\|Sx\|_2^2 - 1 > \epsilon] \leq \delta. \quad (1)$$

We define  $S^i \in \mathbb{R}^{m \times n^{q-1}}$  to have  $\ell$ -th row equal to  $u_i^{\ell,1} \cdot v^\ell$ , where  $v^\ell = u^{\ell,2} \otimes u^{\ell,3} \otimes \dots \otimes u^{\ell,q}$ , and define  $x = (x^1, \dots, x^n)$ , with each  $x^i \in \mathbb{R}^{n^{q-1}}$ , so that  $Sx = \sum_{i=1}^n S^i x^i$ . Then,

$$\|Sx\|_2^2 = \left\| \sum_{i=1}^n S^i x^i \right\|_2^2 = \sum_{i=1}^n \|S^i x^i\|_2^2 + 2 \sum_{i \neq i'} \langle S^i x^i, S^{i'} x^{i'} \rangle.$$

Lemma 2.3 below proves that  $\sum_{i=1}^n \|S^i x^i\|_2^2 = (1 \pm \epsilon/3)\|x\|_2^2$  holds with probability at least  $1 - \delta/10$ . We prove Lemma 2.3 and in effect Theorem 2.2 by induction on  $q$  and applying Theorem 2.2 for  $q' = q - 1$ . To complete the proof, we need to show that that

$$\sum_{i \neq i'} \langle S^i x^i, S^{i'} x^{i'} \rangle \leq \epsilon/3 \quad (2)$$

with probability at least  $1 - 9\delta/10$ . Note that  $S^i x^i = \sum_{\ell=1}^m (1/\sqrt{m}) u_i^{\ell,1} \langle v^\ell, x^i \rangle$ . So showing (2) is equivalent to showing  $\frac{1}{m} \sum_{i \neq i'} \sum_{\ell=1}^m u_i^{\ell,1} u_{i'}^{\ell,1} \langle v^\ell, x^i \rangle \langle v^\ell, x^{i'} \rangle \leq \epsilon/3$ . Rearranging the order of summation, we need to upper bound

$$Z := \frac{1}{m} \sum_{\ell=1}^m \sum_{i \neq i'} u_i^{\ell,1} u_{i'}^{\ell,1} \langle v^\ell, x^i \rangle \langle v^\ell, x^{i'} \rangle := u^T A u,$$

where  $u \in \mathbb{R}^{nm \times 1}$  and  $A \in \mathbb{R}^{nm \times nm}$  is a block-diagonal matrix with  $m$  blocks, each of size  $n \times n$ .

Let  $\mathcal{E}$  be the event that  $\sum_{i=1}^n \|S^i x^i\|_2^2 = (1 \pm \epsilon/3)$ . By Lemma 2.3, we have that  $\Pr[\mathcal{E}] \geq 1 - \delta/10$ .

Furthermore, let  $\mathcal{F}$  be the event that  $\|A\|_2 = O(\frac{\log^{(q-1)}(qn^q m/\delta)}{m})$  and

$$\|A\|_F = O(1/\sqrt{m} + \log^{1/2}(1/\delta) \log^{(2q-3)/2}(m/\delta) \log \log(m/\delta)/m)$$

bounds hold for the operator and Frobenius norm of  $A$ . By a union bound over Lemmas A.4 and A.7, we have that  $\Pr[\mathcal{F}] \geq 1 - \delta/10$ . Lemma A.3 uses the Hanson-Wright Theorem to bound  $Z$  in terms of  $\|A\|_2$  and  $\|A\|_F$  and proves that  $\Pr[Z \geq \epsilon/3 | \mathcal{F}] \leq \delta/2$ .

Putting this all together, we achieve our initial bound on  $\|Sx\|_2^2$ : Taking the probability over all  $u^\ell$  and  $v^\ell$ , we have,

$$\begin{aligned}
\Pr[|\|Sx\|_2^2 - 1| > \epsilon] &\leq \Pr[\neg \mathcal{E}] + \Pr[|\|Sx\|_2^2 - 1| > \epsilon \mid \mathcal{E}] \\
&\leq \delta/10 + \Pr[Z \geq \epsilon/3 \mid \mathcal{E}] \\
&\leq \delta/10 + \frac{\Pr[Z \geq \epsilon/3]}{\Pr[\mathcal{E}]} \\
&\leq \delta/10 + \frac{\Pr[Z \geq \epsilon/3]}{1 - \delta/10} \\
&\leq \delta/10 + (1 + \delta/5) \Pr[Z \geq \epsilon/3] \\
&\leq \delta/10 + (1 + \delta/5)(\Pr[Z \geq \epsilon/3 \mid \mathcal{F}] + \Pr[\neg \mathcal{F}]) \\
&\leq \delta/10 + (1 + \delta/5)(\delta/2 + \delta/10) = 3\delta^2/25 + 7\delta/10 \\
&\leq 3\delta/25 + 7\delta/10 \leq \delta.
\end{aligned}$$

From the  $\delta \leq 1$  assumption it follows that  $\delta^2 \leq \delta$ , which implies the second to last inequality and concludes the proof.  $\square$

**Lemma 2.3.** For all  $q \geq 2$ , any set of fixed vectors  $x^1, \dots, x^n \in \mathbb{R}^{n^{q-1}}$ , sketching dimension  $m = \Theta(\epsilon^{-2} \log(n/\delta) + \epsilon^{-1} \log^{q-1}(n/\delta))$ ,  $\delta < 1/n^{q-1}$ , and matrices  $S^i \in \mathbb{R}^{m \times n^{q-1}}$  defined in the proof of Theorem 2.2, we have that  $\Pr[\sum_{i=1}^n \|S^i x^i\|_2^2 = (1 \pm \epsilon/3) \|x\|_2^2] \geq 1 - \delta/10$ .

*Proof.* Define matrix  $S_0 \in \mathbb{R}^{m \times n^{q-1}}$  such that its  $\ell$ -th row is  $v^\ell$  from the proof of Theorem 2.2. Additionally define  $m \times m$  diagonal matrices  $D^i$  such that  $D_{\ell,\ell}^i := u_{i,\ell}^{\ell,1}$ . Note that  $S^i = D^i S_0$  and therefore  $\|S^i x^i\|_2 = \|D^i S_0 x^i\|_2 = \|S_0 x^i\|_2$  holds since  $D^i$  is  $\pm 1$  diagonal matrix. To prove the lemma, it is sufficient to show that

$$\forall i \in [1, n] : \Pr[\|S_0 x^i\|_2^2 = (1 \pm \epsilon/3) \|x^i\|_2^2] \geq 1 - \delta/(10n) \quad (3)$$

holds, since then we have that  $\sum_{i=1}^n \|S^i x^i\|_2^2 = \sum_{i=1}^n \|S_0 x^i\|_2^2 = (1 \pm \epsilon/3) \sum_{i=1}^n \|x^i\|_2^2 = (1 \pm \epsilon/3) \|x\|_2^2$  with probability at least  $1 - \delta$  by a union bound.

We prove inequality (3) by induction on  $q$ . In the base  $q = 2$  case, entries of  $v^\ell = u^{\ell,2}$  vectors are i.i.d.  $\pm 1$  random variables. Equivalently the entries of  $S_0$  are i.i.d.  $\pm 1$  random variables. Applying the Johnson-Lindenstrauss lemma [30] to  $S_0$  and each  $x^i$  with  $\delta' = \delta/(10n)$  proves the base case.

Now assume that Theorem 2.2 holds for  $q' = q - 1$ . Observe that the structure of  $S_0$  for  $q' = q - 1$  is exactly like that of  $S$  for  $q$ . Setting  $\delta' = \delta/(10n)$  in Theorem 2.2 we have that inequality (3) holds for sketching dimension  $m' = \Theta(\epsilon^{-2} \log(n/\delta') + \epsilon^{-1} \log^{q-1}(n/\delta'))$ . Since  $\log(n/\delta') = \log(n^2/\delta) = \Theta(\log(n/\delta))$  we can simplify  $m'$  to  $\Theta(\epsilon^{-2} \log(n/\delta) + \epsilon^{-1} \log^{q-1}(n/\delta))$  as claimed.  $\square$

## 2.2 Optimizing Our Sketch Size

We define the sketch  $T$ , which is a tensor product of CountSketch matrices. We compose our sketch  $S$  from Section 2.1 with  $T$  in order to remove the dependence on  $n$ . See Section B for the proof.

**Theorem 2.4.** Let  $T$  be a tensor product of  $q$  CountSketch matrices  $T = T^1 \otimes \dots \otimes T^q$ , where each  $T^i$  maps  $\mathbb{R}^n \rightarrow \mathbb{R}^t$  for  $t = \Theta(q^3/(\epsilon^2 \delta))$ . Then for any unit vector  $x \in \mathbb{R}^n$ ,

$$\Pr[|\|Tx\|_2^2 - 1| > \epsilon] \leq \delta.$$

Furthermore, if  $x$  is of the form  $x^1 \otimes x^2 \otimes \dots \otimes x^q$ , for  $x^i \in \mathbb{R}^n$  for  $i = 1, 2, \dots, q$ , then  $Tx = T^1 x^1 \otimes \dots \otimes T^q x^q$ , where  $\text{nnz}(T^i x^i) \leq \text{nnz}(x^i)$  and where the time to compute  $T^i x^i$  is  $O(\text{nnz}(x^i))$  for  $i = 1, 2, \dots, q$ .

## 2.3 Proof of Theorem 2.1

Finally we prove our main claim by composing sketches  $S$  and  $T$  from Sections 2.1 and 2.2.

190 *Proof.* Our overall sketch is  $S \cdot T$ , where  $S$  is the sketching matrix of Section 2.1, with sketching  
191 dimension  $m = \Theta(\epsilon^{-2} \log(t/\delta) + \epsilon^{-1} \log^q(t/\delta))$ , and  $T$  is the sketching matrix of Section  
192 2.2, with sketching dimension  $t = \Theta(q^3/(\epsilon^2 \delta))$ . To satisfy the conditions of Theorem 2.2, set  
193  $\delta_S = 0.5/t^q$ .  $S$  is applied with approximation error  $\epsilon/2$  and failure probability  $\delta_S$  and  $T$  is  
194 applied with  $\epsilon/2$  and  $\delta/2$  respectively. Note that  $\delta_S \leq \delta/2$  and for  $q$  constant,  $\log(t/\delta_S) =$   
195  $\Theta(\log(t^{q+1})) = \Theta(\log(t)) = \Theta(\log(1/(\epsilon \delta)))$  holds. Thus, the sketching dimension  $m$  of  $ST$  is now  
196  $\Theta(\epsilon^{-2} \log(1/(\epsilon \delta)) + \epsilon^{-1} \log^q(1/(\epsilon \delta)))$ , and has no dependence on  $n$ . By Theorems 2.2, 2.4, and a  
197 union bound, we have that for any unit vector  $x \in \mathbb{R}^{n^q}$ ,  $\Pr[| \|S \cdot Tx\|_2^2 - 1 | > \epsilon] \leq \delta$ .

198 In Theorem 2.4 above we show that, if  $x$  is a vector of the form  $x^1 \otimes x^2 \otimes \dots \otimes x^q$ , for  $x^i \in \mathbb{R}^n$   
199 for  $i = 1, 2, \dots, q$ , then  $Tx = T^1 x^1 \otimes \dots \otimes T^q x^q$  where each  $T^i x^i$  can be computed in  $O(\text{nnz}(x^i))$   
200 time and where  $\text{nnz}(T^i x^i) \leq \text{nnz}(x^i)$ . Thus, we can apply  $S$  to  $Tx$  in  $O(\sum_{i=1}^q \text{nnz}(x^i) m)$  time.

201

□

### 202 3 Lower Bound on Our Sketch Size

203 We next show that our sketching dimension of  $m = \Theta(\epsilon^{-2} \log(1/(\delta \epsilon)) + \epsilon^{-1} \log^q(1/(\delta \epsilon)))$  is nearly  
204 tight for our particular sketch  $S \cdot T$ . We will assume that  $q$  is constant. Note that  $S \cdot T$  is an  
205 oblivious sketch, and consequently by lower bounds for any oblivious sketch [23, 26, 30], one has  
206 that  $m = \Omega(\epsilon^{-2} \log(1/\delta))$ . More interestingly, we show a lower bound of  $m = \Omega(\epsilon^{-1} \log^q(1/\delta))$   
207 summarized in the following theorem; see Section C for the proof.

208 **Theorem 3.1.** *For any constant integer  $q$ , there is an input  $x \in \mathbb{R}^{n^q}$  for which if the number*  
209  *$m$  of rows of  $S$  satisfies  $m = o(\epsilon^{-2} \log(1/\delta) + \epsilon^{-1} \log^q(1/\delta))$ , then with probability at least  $\delta$ ,*  
210  *$\|STx\|_2^2 > (1 + \epsilon) \|x\|_2^2$ .*

211 Recall that the upper bound on our sketch size, for constant  $q$ , is  $m = O(\epsilon^{-2} \log(1/(\epsilon \delta)) +$   
212  $\epsilon^{-1} \log^q(1/(\epsilon \delta)))$ , and thus our analysis is nearly tight whenever  $\log(1/(\epsilon \delta)) = \Theta(\log(1/\delta))$ .  
213 This holds, for example, whenever  $\delta < \epsilon$ , which is a typical setting since  $\delta = 1/\text{poly}(n)$  for high  
214 probability applications.

## 215 4 Experiments

216 We evaluate Tensorized Random Projections in three different applications. In Section 4.1 we show  
217 that Tensorized Random Projections always succeed with high probability while TensorSketch always  
218 fails on extremely sparse inputs. Then in Section 4.2 we observe that TensorSketch and Tensorized  
219 Random Projections approximate non-linear SVMs with polynomial kernels equally well. Finally  
220 in Section 4.3 we demonstrate that Random Projections and Tensorized Random Projections are  
221 equally effective in reducing the number of parameters in a neural network while Tensorized Random  
222 Projections are faster to compute. To the best of our knowledge this comprises the first experimental  
223 evaluation of [7]’s compression technique in terms of accuracy. The code for the experiments is  
224 available in the supplementary material.

### 225 4.1 Success Probability of TensorSketch vs Tensorized Random Projection

226 In this section we demonstrate that TensorSketch cannot approximate the polynomial kernel  $\kappa(x, y) =$   
227  $\langle x, y \rangle^q$  accurately for all pairs  $x, y \in V$  simultaneously if the vectors in the set  $V$  are not smooth,  
228 i.e., if  $\|x\|_\infty / \|x\|_2 = \Omega(1)$  holds for all  $x$  in  $V$ . TensorSketch fails even if the sketching dimension  
229  $m$  is much larger than  $|V|$ . On the contrary, Tensorized Random Projection works well.

230 Let a set  $S$  of data points be a standard basis in  $d$  dimensions. If  $k \geq 2$  coordinates of different vectors  
231 collide in the same TensorSketch hash bucket then their common bucket is either zero or non-zero. If  
232 it is 0, then  $\langle e_i, e_i \rangle^q$  is incorrectly estimated as 0 instead of 1. If the common bucket’s value is not  
233 0, then the estimate of  $\langle e_i, e_j \rangle^q$  is non-zero, where  $i$  and  $j$  are any pair of two colliding coordinates.  
234 Thus if there is a collision, then TensorSketch cannot estimate all dot products exactly. Moreover  
235 the estimate cannot be close to the true kernel value either since if the dot product is incorrect, then  
236 it is off by at least 1. Now if  $n \geq \sqrt{2m \ln(1/(1-p))}$  then by the Birthday paradox [1] we have at  
237 least one collision with probability  $p$ . If the number of vectors (and dimension)  $n$  is greater than the  
238 sketching dimension  $m$ , which is the interesting case for sketching, then there is always a collision

by the pigeonhole principle. We remark that [25] provides a more detailed analysis of this sketching dimension vs input vector smoothness tradeoff for CountSketch, which is a key building block of TensorSketch.

We illustrate the above phenomena in Figure 1(a) as follows. We fix the sketch size  $m = 100$  and vary the input dimension (= number of vectors)  $n$  along the x-axis. We measure the largest absolute error in approximating  $\kappa(e_i, e_j) = \langle x, y \rangle^2 = \delta_{ij}$  among the first  $n$  standard basis vectors and repeat the experiment with 100 randomly drawn TensorSketch and Tensorized Random Projection instances. The y-axis shows the average of the maximum error in approximating the true kernel, where error bars correspond to one standard deviation. It is clear that TensorSketch's error quickly becomes the largest possible, 1, as the number  $n$  of vectors passes the critical threshold  $\sqrt{100}$ , while Tensorized Random Projection's max error is much smaller, more concentrated, and grows at a much slower rate in the same setting.

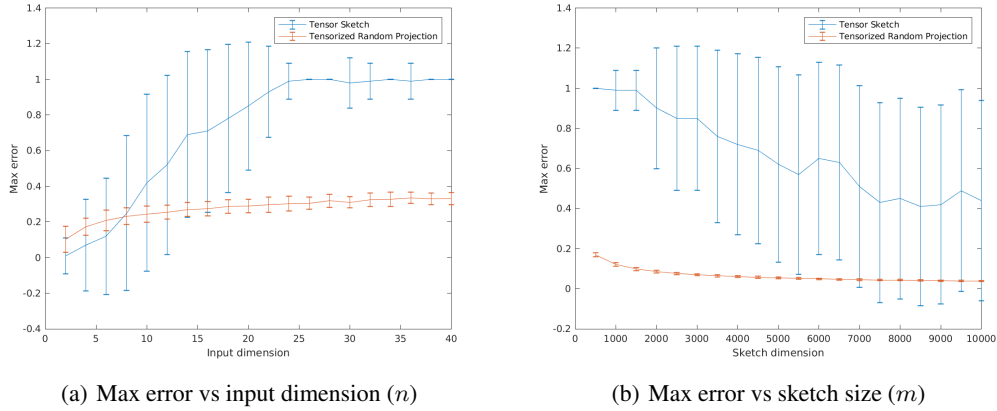

Figure 1: Maximum Error

Next, in Figure 1(b) we fix the input dimension (= number of vectors) to  $n = 100$  and vary the sketch size  $m$  along the x-axis instead. The y-axis remains unchanged. We again observe that TensorSketch's max error decreases very slowly and it is still about 40% of the largest error possible (1) on average at sketching size  $m = n^2 = 10^4 \ll d$ . Tensorized Random Projection's max error is almost an order of magnitude smaller at the same sketch size.

## 4.2 Comparison of Sketching Methods for SVMs with Polynomial Kernel

We replicate experiments from [34] to compare Tensorized Random Projections with TensorSketch (TS) and Random Maclaurin (RM) sketch. We approximate the polynomial kernel  $\langle x, y \rangle^2$  for the Adult [18] and MNIST [31] datasets, by applying one of the above three sketches to the dataset. We then train a linear SVM on the sketched dataset using LIBLINEAR [20], and report the training accuracy. This accuracy is the median accuracy of 5 trials. Our baseline is the training accuracy of a non-linear SVM trained with the exact kernel by LIBSVM [12]. We experiment with between 100 and 500 random features.

Both Figures 2(a) and 2(b) show that Tensorized Random Projection has similar accuracy to TensorSketch, and both have far better accuracy than Random Maclaurin. Recall that Random Maclaurin approximates the kernel function  $\kappa$  with its Maclaurin series. For each sketch coordinate it randomly picks degree  $t$  with probability  $2^{-t}$  and computes degree- $t$  Tensorized Random Projection. This is rather inefficient for the polynomial kernel, which has exactly one non-zero coefficient in its Maclaurin expansion. Random Maclaurin's generality is not required for the polynomial kernel and we can obtain more accurate results for general kernels by sampling degree  $t$  proportional to its Maclaurin coefficient.

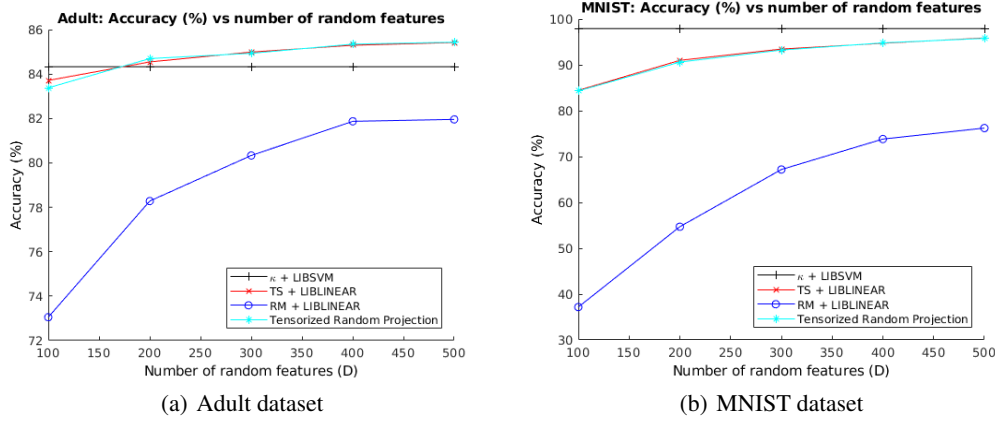

Figure 2: Accuracy vs Number of Random Features

### 4.3 Compressing Neural Networks

We begin with a standard 2-layer fully connected neural network trained on MNIST [31] with a baseline test accuracy of around 0.97. The first layer has dimension (784x512) and the top layer has dimension (512x10). Further specifics of the model can be found in the TensorFlow tutorials [3]. We sketch the weight matrix in the top layer using either Tensorized Random Projection or Random Projection. We then reinsert this sketched matrix into the original model and evaluate its accuracy on the MNIST test set. We compare both the test accuracy and the time needed to compute the sketch for both methods.

In Figure 3(a) we see that both Tensorized Random Projection and Random Projection reach similar test accuracy for the same number of parameters. Figure 3(b) illustrates that Tensorized Random Projection runs somewhat faster than ordinary Random Projection.

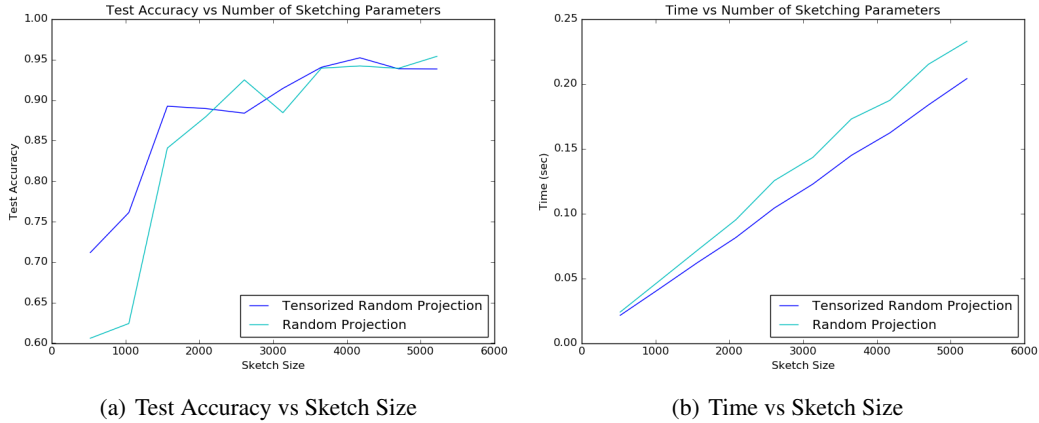

Figure 3: Sketching the Last Layer of MNIST Neural Network

## 5 Conclusion

We presented a new analysis of Tensorized Random Projection, providing nearly optimal bounds and demonstrated its versatility in multiple applications. An interesting question left for future work is whether its  $m \cdot \sum_{i=1}^q \text{nnz}(x_i)$  running time could be further improved for dense  $x$ . We conjecture that the iid random  $u_i^\ell$  Rademacher vectors might be replaced with fast pseudo-random rotations, perhaps a product of one or more randomized Hadamard matrices similar to ideas in [6], which could possibly lead to an  $O(m \log n)$  running time.



## References

- [1] [https://en.wikipedia.org/wiki/Birthday\\_problem#Cast\\_as\\_a\\_collision\\_problem](https://en.wikipedia.org/wiki/Birthday_problem#Cast_as_a_collision_problem).
- [2] [https://en.wikipedia.org/wiki/Polynomial\\_kernel](https://en.wikipedia.org/wiki/Polynomial_kernel), practical use section.
- [3] Martín Abadi, Ashish Agarwal, Paul Barham, Eugene Brevdo, Zhifeng Chen, Craig Citro, Greg S. Corrado, Andy Davis, Jeffrey Dean, Matthieu Devin, Sanjay Ghemawat, Ian Goodfellow, Andrew Harp, Geoffrey Irving, Michael Isard, Yangqing Jia, Rafal Jozefowicz, Lukasz Kaiser, Manjunath Kudlur, Josh Levenberg, Dan Mané, Rajat Monga, Sherry Moore, Derek Murray, Chris Olah, Mike Schuster, Jonathon Shlens, Benoit Steiner, Ilya Sutskever, Kunal Talwar, Paul Tucker, Vincent Vanhoucke, Vijay Vasudevan, Fernanda Viégas, Oriol Vinyals, Pete Warden, Martin Wattenberg, Martin Wicke, Yuan Yu, and Xiaoqiang Zheng. TensorFlow: Large-scale machine learning on heterogeneous systems, 2015. Software available from tensorflow.org.
- [4] Thomas Dybdahl Ahle and Jakob Bæk Tejs Knudsen. High probability tensor sketch, 2019.
- [5] Noga Alon, Yossi Matias, and Mario Szegedy. The space complexity of approximating the frequency moments. *J. Comput. Syst. Sci.*, 58(1):137–147, 1999.
- [6] Alexandr Andoni, Piotr Indyk, Thijs Laarhoven, Ilya Razenshteyn, and Ludwig Schmidt. Practical and optimal lsh for angular distance. In *Advances in Neural Information Processing Systems*, pages 1225–1233, 2015.
- [7] Sanjeev Arora, Rong Ge, Behnam Neyshabur, and Yi Zhang. Stronger generalization bounds for deep nets via a compression approach. In *Proceedings of the 35th International Conference on Machine Learning, ICML 2018, Stockholmsmässan, Stockholm, Sweden, July 10-15, 2018*, pages 254–263, 2018.
- [8] Rosa I. Arriaga and Santosh Vempala. An algorithmic theory of learning: Robust concepts and random projection. In *40th Annual Symposium on Foundations of Computer Science, FOCS '99, 17-18 October, 1999, New York, NY, USA*, pages 616–623, 1999.
- [9] Avrim Blum. Random projection, margins, kernels, and feature-selection. In *Subspace, Latent Structure and Feature Selection, Statistical and Optimization, Perspectives Workshop, SLSFS 2005, Bohinj, Slovenia, February 23-25, 2005, Revised Selected Papers*, pages 52–68, 2005.
- [10] Vladimir Braverman, Kai-Min Chung, Zhenming Liu, Michael Mitzenmacher, and Rafail Ostrovsky. Ams without 4-wise independence on product domains. In *27th International Symposium on Theoretical Aspects of Computer Science (STACS 2010)*, 2010.
- [11] Emmanuel J. Candès, Justin K. Romberg, and Terence Tao. Robust uncertainty principles: exact signal reconstruction from highly incomplete frequency information. *IEEE Trans. Information Theory*, 52(2):489–509, 2006.
- [12] Chih-Chung Chang and Chih-Jen Lin. LIBSVM: A library for support vector machines. *ACM Transactions on Intelligent Systems and Technology*, 2:27:1–27:27, 2011. Software available at <http://www.csie.ntu.edu.tw/~cjlin/libsvm>.
- [13] Moses Charikar, Kevin Chen, and Martin Farach-Colton. Finding frequent items in data streams. In *International Colloquium on Automata, Languages, and Programming*, pages 693–703. Springer, 2002.
- [14] Kenneth L. Clarkson and David P. Woodruff. Low rank approximation and regression in input sparsity time. In *Symposium on Theory of Computing Conference, STOC'13, Palo Alto, CA, USA, June 1-4, 2013*, pages 81–90, 2013.
- [15] Michael B. Cohen, T. S. Jayram, and Jelani Nelson. Simple analyses of the sparse Johnson-Lindenstrauss transform. In *1st Symposium on Simplicity in Algorithms, SOSA 2018, January 7-10, 2018, New Orleans, LA, USA*, pages 15:1–15:9, 2018.
- [16] Andrew Cotter, Joseph Keshet, and Nathan Srebro. Explicit approximations of the Gaussian kernel. *CoRR*, 2011.

- [17] Sanjoy Dasgupta and Anupam Gupta. An elementary proof of a theorem of Johnson and Lindenstrauss. *Random Struct. Algorithms*, 22(1):60–65, 2003.
- [18] Dua Dheeru and Efi Karra Taniskidou. UCI machine learning repository, 2017.
- [19] David L. Donoho. Compressed sensing. *IEEE Trans. Information Theory*, 52(4):1289–1306, 2006.
- [20] Rong-En Fan, Kai-Wei Chang, Cho-Jui Hsieh, Xiang-Rui Wang, and Chih-Jen Lin. LIBLINEAR: A library for large linear classification. *Journal of Machine Learning Research*, 9:1871–1874, 2008.
- [21] Sariel Har-Peled, Piotr Indyk, and Rajeev Motwani. Approximate nearest neighbor: Towards removing the curse of dimensionality. *Theory of Computing*, 8(1):321–350, 2012.
- [22] Piotr Indyk and Andrew McGregor. Declaring independence via the sketching of sketches. In *Proceedings of the nineteenth annual ACM-SIAM symposium on Discrete algorithms*, pages 737–745. Society for Industrial and Applied Mathematics, 2008.
- [23] T. S. Jayram and David P. Woodruff. Optimal bounds for Johnson-Lindenstrauss transforms and streaming problems with subconstant error. *ACM Trans. Algorithms*, 9(3):26:1–26:17, 2013.
- [24] William B Johnson and Joram Lindenstrauss. Extensions of Lipschitz mappings into a Hilbert space. *Contemporary Mathematics*, 1984.
- [25] Lior Kamra, Casper B Freksen, and Kasper Green Larsen. Fully understanding the hashing trick. In *Advances in Neural Information Processing Systems*, pages 5394–5404, 2018.
- [26] Daniel M. Kane, Raghu Meka, and Jelani Nelson. Almost optimal explicit Johnson-Lindenstrauss families. In *Approximation, Randomization, and Combinatorial Optimization. Algorithms and Techniques - 14th International Workshop, APPROX 2011, and 15th International Workshop, RANDOM 2011, Princeton, NJ, USA, August 17-19, 2011. Proceedings*, pages 628–639, 2011.
- [27] Daniel M. Kane and Jelani Nelson. Sparser Johnson-Lindenstrauss transforms. *J. ACM*, 61(1):4:1–4:23, 2014.
- [28] Michael Kapralov, Rasmus Pagh, Ameya Velingker, David Woodruff, and Amir Zandieh. Sketching high-degree polynomial kernels, 2019.
- [29] Purushottam Kar and Harish Karnick. Random feature maps for dot product kernels. In *Proceedings of the Fifteenth International Conference on Artificial Intelligence and Statistics, AISTATS 2012, La Palma, Canary Islands, Spain, April 21-23, 2012*, pages 583–591, 2012. Later: *Journal of Machine Learning Research (JMLR)* : WCP, 22:583-591.
- [30] Kasper Green Larsen and Jelani Nelson. Optimality of the Johnson-Lindenstrauss lemma. In *58th IEEE Annual Symposium on Foundations of Computer Science, FOCS 2017, Berkeley, CA, USA, October 15-17, 2017*, pages 633–638, 2017.
- [31] Yann LeCun and Corinna Cortes. MNIST handwritten digit database. 2010.
- [32] S. Muthukrishnan. Data streams: Algorithms and applications. *Foundations and Trends in Theoretical Computer Science*, 1(2), 2005.
- [33] Rasmus Pagh. Compressed matrix multiplication. In *Innovations in Theoretical Computer Science 2012, Cambridge, MA, USA, January 8-10, 2012*, pages 442–451, 2012.
- [34] Ninh Pham and Rasmus Pagh. Fast and scalable polynomial kernels via explicit feature maps. In *The 19th ACM SIGKDD International Conference on Knowledge Discovery and Data Mining, KDD 2013, Chicago, IL, USA, August 11-14, 2013*, pages 239–247, 2013.
- [35] Terence Tao. Math 254a: Notes 1: Concentration of measure, <https://terrytao.wordpress.com/2010/01/03/254a-notes-1-concentration-of-measure/>, 2010.
- [36] David P. Woodruff. Sketching as a tool for numerical linear algebra. *Foundations and Trends in Theoretical Computer Science*, 10(1-2):1–157, 2014.

385 This appendix is organized as follows:

- 386 1. In Section A we prove technical Lemmas used in Section 2.1.
- 387 2. In Section B we prove Theorem 2.4.
- 388 3. In Section C we prove Theorem 3.1.
- 389 4. In Section D we provide a note about previous analysis of Tensorized Random Projections.

## 390 A Additional Lemmas from Section 2.1

### 391 A.1 Preliminaries

392 We write  $f(x) \lesssim g(x)$  if  $f(x) = O(g(x))$ . For random variable  $X$  and  $w \in \mathbb{R}$ ,  $\|X\|_w$  denotes  
 393  $(\mathbf{E}[|X|^w])^{1/w}$ . Minkowski's inequality shows that  $\|\cdot\|_w$  is a norm if  $w \geq 1$ . We use  $\|A\|_F$  for the  
 394 Frobenius norm of a matrix  $A$ , and  $\|A\|$  for its operator norm.

395 We need the following form of Khintchine's inequality [15].

396 **Theorem A.1.** (*Khintchine*) *There is a constant  $C > 0$  such that for  $\sigma_1, \dots, \sigma_n$  independent*  
 397 *Rademacher (i.e., uniform in  $\{1, -1\}$ ) random variables, and any fixed  $x \in \mathbb{R}^n$ ,  $\Pr[(\sum_{i=1}^n \sigma_i x_i)^2 >$*   
 398  *$C\sqrt{\log(1/\delta)}\|x\|_2^2] \leq \delta$ .*

399 We next state the following version of the Hanson-Wright inequality [15] that we need.

**Theorem A.2.** (*Hanson-Wright*) *For  $\sigma_1, \dots, \sigma_n$  independent Rademachers (i.e., uniform in  $\{1, -1\}$ )*  
*and  $A \in \mathbb{R}^{n \times n}$ , for all  $w \geq 1$ ,*

$$\|\sigma^T A \sigma - \mathbf{E}[\sigma^T A \sigma]\|_w \leq O(1) \cdot (\sqrt{w}\|A\|_F + w \cdot \|A\|).$$

### 400 A.2 Lemmas

401 **Lemma A.3.** *Let  $Z := u^T A u$ , where  $A$  and  $u$  are as described in Theorem 2.2. Let  $\mathcal{F}$  be the*  
 402 *event that the bounds on  $\|A\|_F$  and  $\|A\|_2$  hold as described in Lemmas A.7 and A.4. Then  $\Pr[Z \geq$*   
 403  *$\epsilon/3 | \mathcal{F}] \leq \delta/2$ .*

404 *Proof.* We will set  $w = \Theta(\log(1/\delta))$ . By Hanson-Wright and the triangle inequality, where the  
 405 randomness is taken only with respect to  $u^1, \dots, u^m$  and not with respect to  $v^1, \dots, v^m$ , we have

$$\|Z\|_w \leq \|\sqrt{w} \cdot \|A\|_F + w \cdot \|A x\|_w \tag{4}$$

$$\leq \sqrt{w} \cdot \|A\|_F + w \cdot \|A\|_w. \tag{5}$$

406 Note that here we use that for any fixing of  $v^1, \dots, v^m$ , and thus  $A$ , since  $i \neq i'$  we have  $\mathbf{E}[Z] = 0$ ,  
 407 where the expectation is taken with respect to  $u^1, \dots, u^m$ . Lemma A.4 proves that, with probability  
 408 at least  $1 - \delta/20$ ,

$$\|A\|_2 = O\left(\frac{\log^{(q-1)}(qn^q m/\delta)}{m}\right) \tag{6}$$

409 and Lemma A.7 proves that, with probability at least  $1 - \delta/20$ ,

$$\|A\|_F = O(1/\sqrt{m} + \log^{1/2}(1/\delta) \log^{(2q-3)/2}(m/\delta) \log \log(m/\delta)/m) \tag{7}$$

410 Define  $\mathcal{F}$  to be the event that (6) and (7) both hold. By a union bound, we have that  $\Pr[\mathcal{F}] \geq 1 - \delta/10$ .  
 411 We can now bound  $\Pr[Z \geq \epsilon/3 | \mathcal{F}]$ :

$$\begin{aligned} \Pr[Z \geq \epsilon/3 | \mathcal{F}] &= \Pr[Z^w \geq (\epsilon/3)^w | \mathcal{F}] \\ &\leq (\epsilon/3)^{-w} \mathbf{E}[Z^w | \mathcal{F}] \\ &\leq (\epsilon/3)^{-w} \cdot 2^w \cdot \mathbf{E}[\max(\sqrt{w}^w \cdot \|A\|_F^w, w^w \cdot \|A\|_w^w) | \mathcal{F}] \end{aligned}$$

412 where we now justify these inequalities. The first inequality is Markov's inequality. The second  
 413 inequality is the Hanson-Wright inequality, where we have used that  $a + b \leq 2 \max(a, b)$ .

We now set  $w = \Theta(\log(1/\delta))$  for a large enough constant in the  $\Theta(\cdot)$  notation. Recall that given  $\mathcal{F}$ , both (7) and (6) hold. We choose  $m$  so that it satisfies the following three constraints: We need  $m = \Omega(\log(1/\delta) \log^{(2q-3)/2}(m/\delta) \log \log(m/\delta))/\epsilon$  as well as  $m = \Omega(\epsilon^{-2} \log(1/\delta))$ , so that  $\sqrt{w}^w \cdot \|A\|_F^w \leq \epsilon^w/C_1^w$ . We also need  $m = \Omega(\epsilon^{-1} \log^{(q-1)}(nm/\delta) \log(1/\delta))$  so that  $w^w \cdot \|A\|^w \leq \epsilon^q/C_1^q$ .

A sketch size of  $m = \Theta(\epsilon^{-2} \log(n/\delta) + \epsilon^{-1} \log^q(n/\delta))$  satisfies these constraints, using that  $\log(1/\delta) \log^{(2q-3)/2}(m/\delta) \log \log(m/\delta) \leq \log^q(n/\delta)$ . Note that we can assume  $m \leq n^q$ , otherwise we could instead use the identity matrix as our sketching matrix. With this setting of  $m$ , we have that

$$\Pr[Z \geq \epsilon/3 \mid \mathcal{F}] \leq (\epsilon/3)^{-w} \cdot 2^w \cdot \mathbf{E}[\max((\epsilon/C_1)^w, (\epsilon/C_1)^q \mid \mathcal{F})],$$

and by setting  $C_1 > \max((2 \cdot 6^w/\delta)^{1/w}, (2 \cdot 6^w \epsilon^{q-w}/\delta)^{1/q})$  we have that  $\Pr[Z > \epsilon/3 \mid \mathcal{F}] \leq \delta/2$ .  $\square$

**Lemma A.4.** *With probability at least  $1 - \delta/20$ ,  $\|A\|_2 = O(\frac{\log^{(q-1)}(qn^q m/\delta)}{m})$*

*Proof.* Since  $A$  is block-diagonal, its operator norm is the largest operator norm of any block. The  $\ell$ -th block in  $A$  can be written as  $(1/m)y^\ell(y^\ell)^T$  where  $y^\ell \in \mathbb{R}^n$  for each  $\ell \in [m]$ , and  $y_i^\ell = \langle v^\ell, x^i \rangle$ . Since  $y^\ell(y^\ell)^T$  is a rank-1 matrix, the eigenvalue of the  $\ell$ -th block is equal to  $(1/m)\text{Tr}(y^\ell(y^\ell)^T)$ , which is at most  $(1/m)\|y^\ell\|_2^2$ . Thus,  $\|A\| \leq (1/m) \max_{\ell=1}^m \|y^\ell\|_2^2$  with probability 1, where the probability is taken only over  $u^1, \dots, u^m$ .

We next bound  $|\langle v^\ell, x^i \rangle|$ , where recall  $v^\ell = u^{\ell,2} \otimes u^{\ell,3} \otimes \dots \otimes u^{\ell,q}$ . By A.5 we have that  $|\langle v^\ell, x^i \rangle| = O(\log^{(q-1)/2}(qn^q m/\delta))$  with probability at least  $1 - \delta/(20nm)$ . If this occurs, then  $\|y^\ell\|_2^2 = O(\log^{(q-1)}(qn^q m/\delta))\|x\|_2^2 = O(\log^{(q-1)}(qn^q m/\delta))$  since  $\|x\|_2 = 1$ . Taking a union bound over all  $m$  vectors  $v^\ell$  and all  $n$  vectors  $x^i$  we have that  $\|A\|_2 = O(\frac{\log^{(q-1)}(qn^q m/\delta)}{m})$  with probability at least  $1 - \delta/20$ .  $\square$

**Lemma A.5.** *Let  $x^i \in \mathbb{R}^{n^{q-1}}$  be an arbitrary vector and let  $v^\ell = u^{\ell,2} \otimes u^{\ell,3} \otimes \dots \otimes u^{\ell,q}$  be the tensor product of  $q-1$  random sign vectors  $u^{\ell,j} \in \{-1, +1\}^n$ . Then  $|\langle v^\ell, x^i \rangle| = O(\log^{(q-1)/2}(qn^q m/\delta))$  with probability at least  $1 - \delta/(20nm)$*

*Proof.* Without loss of generality, we can prove this for the case where  $x^i$  is a unit vector. In this case it suffices to show that  $|\langle v^\ell, x^i \rangle| = O(\log^{(q-1)/2}(qn^q m/\delta))\|x^i\|_2^2$  with probability at least  $1 - \delta/(20nm)$ . Proof by induction. The base case is  $k = 2$ : In this case  $v^\ell = u^{\ell,2}$ , so  $v^\ell$  is a random sign vector. Applying Khintchine's inequality with  $\delta' = \delta/(40n^2m)$  shows that  $|\langle v^\ell, x^i \rangle| = O(\log^{1/2}(40n^2m/\delta))\|x^i\|_2^2$  with probability at least  $1 - \delta/(40n^2m)$ , so the base case holds. Assume that for  $k = q-1$ ,  $|\langle v^\ell, x^i \rangle| = O(\log^{(q-2)/2}(qn^q m/\delta))\|x^i\|_2^2$  with probability at least  $1 - \delta(q-1)n^{q-2}/(20qn^q m)$ . In the case of  $k = q$ , note that by Lemma A.8, we have that

$$|\langle v^\ell, x^i \rangle| = |u^{\ell,2T} X(u^{\ell,3} \otimes \dots \otimes u^{\ell,q})|,$$

where we have rewritten the vector  $x^i$  as an  $n \times n^{q-2}$  matrix  $X$ . Let

$$u' = (u^{\ell,3} \otimes \dots \otimes u^{\ell,q}).$$

Note that  $Xu'$  is a vector of length  $n$  where the  $p$ -th entry is equal to  $\langle X_{i,*}, u' \rangle$ , where  $X_{i,*}$  is the  $i$ -th row of  $X$ . Computing  $\langle X_{i,*}, u' \rangle$  is simply the  $k = q-1$  case, so by the induction hypothesis, we know that  $\langle X_{i,*}, u' \rangle = O(\log^{(q-2)/2}(qn^q m/\delta))\|x^i\|_2^2$  with probability at least  $1 - \delta(q-1)n^{q-2}/(20qn^q m)$ . Taking a union bound we have that every entry of  $Xu'$  is simultaneously bounded by  $O(\log^{(q-2)/2}(qn^q m/\delta))\|x^i\|_2^2$  for  $i = 1 \dots n$  with probability at least  $1 - \delta(q-1)n^{q-1}/(20qn^q m)$ . We now compute  $|u^{\ell,2T}(Xu')|$ . Since  $u^{\ell,2}$  is a random sign vector, we apply Khintchine's inequality with  $\delta' = \delta/(20qn^q m)$  and have that  $|\langle v^\ell, x^i \rangle| = |\langle u^{\ell,2}, (Xu') \rangle| = O(\log^{1/2}(qn^q m/\delta))\|(Xu')\|_2^2$  with probability at least  $1 - \delta/(20qn^q m)$ .  $\|(Xu')\|_2^2 \leq \sum_{i=1}^n O(\log^{(q-2)/2}(qn^q m/\delta))\|x^i\|_2^2$ , so by another union bound  $|\langle v^\ell, x^i \rangle| = O(\log^{(q-1)/2}(qn^q m/\delta))$  with probability at least  $1 - \delta/(20nm)$ .  $\square$

447 **Lemma A.6.** Let  $x^i \in \mathbb{R}^{n^{q-1}}$  be an arbitrary unit vector and let  $v^\ell = u^{\ell,2} \otimes u^{\ell,3} \otimes \dots \otimes u^{\ell,q}$  be  
 448 the tensor product of  $q-1$  random sign vectors  $u^{\ell,j} \in \{-1, +1\}^n$ . Then  $\langle v^\ell, x^i \rangle^2 \leq t^{1/2} \|x^i\|_2^2$  with  
 449 probability at least  $1 - qn^{q-1}e^{-\Theta(t^{1/(2(q-1))})}$ .

*Proof.* Proof by induction. The base case is  $k = 2$ . In this case  $v^\ell = u^{\ell,2}$ , so  $v^\ell$  is a random sign vector. Applying Khintchine's inequality with  $\delta' = qn^{q-1}e^{-\Theta(t^{1/(2(q-1))})}$  we have that  $(\langle v^\ell, x^i \rangle)^2 \leq t^{1/2} \|x^i\|_2^2$  with probability at least  $1 - 2ne^{-\Theta(t^{1/2})}$ . Assume that for  $k = q-1$ ,  $(\langle v^\ell, x^i \rangle)^2 \leq t^{1/2(q-2)} \|x^i\|_2^2$  with probability at least  $1 - (q-1)n^{q-2}e^{-\Theta(t^{(q-2)/(2(q-1))})}$ . In the case of  $k = q$ , note that by Lemma A.8, we have that

$$|\langle v^\ell, x^i \rangle| = |u^{\ell,2T} X(u^{\ell,3} \otimes \dots \otimes u^{\ell,q})|,$$

where we have rewritten the vector  $x^i$  as an  $n \times n^{q-2}$  matrix  $X$ . Let

$$u' = u^{\ell,3} \otimes \dots \otimes u^{\ell,q}.$$

450 Note that  $Xu'$  is a vector of length  $n$  where the  $p$ -th entry is equal to  $\langle X_{i,*}, u' \rangle$ , where  $X_{i,*}$  is the  
 451  $i$ -th row of  $X$ . Computing  $\langle X_{i,*}, u' \rangle$  is simply the  $k = q-1$  case, so by the induction hypothesis, we  
 452 know  $(\langle v^\ell, x^i \rangle)^2 \leq t^{(q-1)/2(q-2)} \|x^i\|_2^2$  with probability at least  $1 - (q-1)n^{q-2}e^{-\Theta(t^{(q-2)/(2(q-1))})}$ .  
 453 Taking a union bound, for each of the  $n$  entries of  $Xu'$  it simultaneously holds that  $|\langle X_{i,*}, u' \rangle| \leq$   
 454  $t^{(q-1)/2(q-2)} \|X_{i,*}\|_2$  with probability at least  $1 - (q-1)n^{q-1}e^{-\Theta(t^{(q-2)/(2(q-1))})}$ . We apply Khint-  
 455 chine's inequality again with  $\delta'$  to bound  $\langle u^{\ell,2}, (Xu') \rangle$ . Thus with a second union bound we have  
 456 that

$$\begin{aligned} \langle u^{\ell,2}, (Xu') \rangle &\leq t^{1/2(q-1)} \sum_{i=1}^n \|(Xu')_i\|_2^2 \\ &\leq t^{1/2(q-1)} \cdot t^{(q-2)/2(q-1)} \sum_{i=1}^n \|X_{i,*}\|_2^2 \\ &\leq t^{1/2} \|x^i\|_2^2 \end{aligned}$$

457 with probability at least  $1 - qn^{q-1}e^{-\Theta(t^{1/(2(q-1))})}$ .  $\square$

**Lemma A.7.** With probability at least  $1 - \delta/20$ ,

$$\|A\|_F = O(1/\sqrt{m} + \log^{1/2}(1/\delta) \log^{(2q-3)/2}(m/\delta) \log \log(m/\delta)/m)$$

458 *Proof.* As in Lemma A.4,  $A$  is block-diagonal, and the  $\ell$ -th block in  $A$  can be written as  
 459  $(1/m)y^\ell(y^\ell)^T$  where  $y^\ell \in \mathbb{R}^n$  for each  $\ell \in [m]$ , and  $y_i^\ell = \langle v^\ell, x^i \rangle$ . We therefore have that

$$\|A\|_F^2 = \frac{1}{m^2} \sum_{\ell=1}^m \|y^\ell\|_2^4. \quad (8)$$

460 Note that for  $\ell = 1, \dots, m$ , the  $\|y^\ell\|_2^4$  are independent random variables. Further for each  $\ell \in [m]$   
 461 and any  $t > 0$ , we have,

$$\begin{aligned} \Pr[\|y^\ell\|_2^4 \geq t] &= \Pr[(\sum_{i=1}^n \langle v^\ell, x^i \rangle^2)^2 \geq t] \\ &\leq \Pr[\exists i \in [n] \text{ such that } \langle v^\ell, x^i \rangle^2 \geq \sqrt{t} \|x^i\|_2^2]. \end{aligned} \quad (9)$$

462 To understand  $\Pr[\langle v^\ell, x^i \rangle^2 \geq \sqrt{t} \|x^i\|_2^2]$ , note that by A.6, we have that  $(\langle v^\ell, x^i \rangle)^2 \leq t^{1/2} \|x^i\|_2^2$  with  
 463 probability at least  $1 - qn^{q-1}e^{-\Theta(t^{1/(2(q-1))})}$ . Since  $q$  is constant this is  $1 - n^{q-1}e^{-\Theta(t^{1/(2(q-1))})}$ .  
 464 Plugging into (9), we have that

$$\Pr[\|y^\ell\|_2^4 \geq t] \leq n^q \cdot e^{-\Theta(t^{1/(2(q-1))})}. \quad (10)$$

465 Equipped with (10), we now analyze  $S := \sum_{\ell=1}^m \|y^\ell\|_2^4$ . For  $j \geq 1$ , let  $S_j = \{\ell \mid 2^j \leq \|y^\ell\|_2^4 \leq$   
 466  $2^{j+1}\}$ , and let  $S_0 = \{\ell \mid \|y^\ell\|_2^4 \leq 1\}$ . Then  $S \leq 2 \cdot \sum_{j \geq 0} 2^j |S_j|$ . Using (9), for each  $j$ ,

$$\begin{aligned} \Pr[|S_j| > \frac{t}{2^j 100 j^2}] &\leq \binom{m}{t/(2^j 100 j^2)} \cdot e^{-\Theta(2^{j/(2(q-1))}) \cdot t/(2^j j^2)} \\ &\leq \left( \frac{m 2^j 100 j^2 e}{t} \right)^{t/(2^j 100 j^2)} \cdot e^{-\Theta(t/(2^{j(2q-3)/(2q-2)} j^2))} \end{aligned} \quad (11)$$

467 We will set  $t \geq m$ , and thus (11) becomes:

$$\Pr[|S_j| > \frac{t}{2^j 100 j^2}] \leq 2^{ct/(2^j j) - c't/(2^{j(2q-3)/(2q-2)} j^2)}, \quad (12)$$

468 where  $c, c' > 0$  are absolute constants. For  $j$  larger than an absolute constant  $j_0$ , (12) is just equal to

$$2^{-\Theta(t/(2^{j(2q-3)/(2q-2)} j^2))}. \quad (13)$$

469 This probability is maximized when  $j$  is as large as possible. To control it, we define the event  $\mathcal{G}$   
 470 that  $\|y^\ell\|_2^4 \leq C \log^{2(q-1)}(m/\delta)$  for a sufficiently large constant  $C > 0$ . W.l.o.g., we also choose  
 471  $C$  so that  $2^{j_1} = C \log^{2(q-1)}(m/\delta)$  for an integer  $j_1$ . Applying (10) and a union bound, and using  
 472 the fact that  $d < 1/n^q$ , we have that with probability  $1 - \delta/40$ , simultaneously for all  $\ell \in [m]$ ,  
 473  $\|y^\ell\|_2^4 \leq C \log^{2(q-1)}(m/\delta)$ , and so  $\Pr[\cup_{j > j_1} S_j = \emptyset] \geq 1 - \delta/40$ . Also,  $\sum_{j=0, \dots, j_0} 2^j |S_j| \leq Cm$ ,  
 474 for a constant  $C > 0$ , with probability 1.

475 Consequently,

$$\begin{aligned} \Pr[S > t] &\leq \Pr[2 \cdot \sum_{j \geq 0} 2^j |S_j| > t] \\ &\leq \Pr[2 \cdot \sum_{j=j_0}^{\infty} 2^j |S_j| > t - Cm] \\ &= \Pr[\sum_{j=j_0}^{\infty} 2^j |S_j| > (t - Cm)/2] \\ &\leq \sum_{j=j_0}^{\infty} \Pr[|S_j| > \frac{(t - Cm)/2}{2^j 100 j^2}] \\ &= \sum_{j=j_1}^{\infty} \Pr[|S_j| > \frac{(t - Cm)/2}{2^j 100 j^2}] + \sum_{j=j_0}^{j_1} \Pr[|S_j| > \frac{(t - Cm)/2}{2^j 100 j^2}] \\ &\leq \Pr[\cup_{j > j_1} S_j \neq \emptyset] + \sum_{j=j_0}^{j_1} \Pr[|S_j| > \frac{(t - Cm)/2}{2^j 100 j^2}] \\ &\leq \delta/40 + \sum_{j=j_0}^{j_1} \Pr[|S_j| > \frac{(t - Cm)/2}{2^j 100 j^2}] \\ &\leq \delta/40 + \sum_{j=j_0}^{j_1} 2^{-\Theta(t/(2^{j(2q-3)/(2q-2)} j^2))} \end{aligned}$$

476 where the first inequality uses that  $S < 2 \cdot \sum_{j \geq 0} 2^j |S_j|$ , the second inequality uses that  
 477  $\sum_{j=0, \dots, j_0} 2^j |S_j| \leq Cm$  with probability 1, the third inequality uses the fact that if we did not  
 478 have  $|S_j| > \frac{(t - Cm)/2}{2^j 100 j^2}$  then we would have  $\sum_{j=j_0}^{\infty} 2^j |S_j| \leq (t - Cm)/2$ , the fifth inequality uses  
 479 that  $\Pr[\cup_{j > j_1} S_j = \emptyset] \geq 1 - \delta/40$ , and the final inequality uses (13), the definition of  $j_0$ , and that  
 480 we can assume  $t - Cm = \Theta(t)$  if we choose  $t > 2Cm$ .

Finally, note that  $\sum_{j=j_0}^{j_1} 2^{-\Theta(t/(2^{j(2q-3)/(2q-2)}j_1^2))}$  is equal to  $2^{-\Theta(t/(2^{j_1(2q-3)/(2q-2)}j_1^2))}$ . Recalling that  $2^{j_1} = C \log^{2(q-1)}(m/\delta)$ , this expression is equal to  $2^{-\Theta(t/(\log^{2q-3}(m/\delta) \log^2 \log(m/\delta)))}$ . Setting

$$t = C' \log(1/\delta) \log^{2q-3}(m/\delta) \log^2 \log(m/\delta) + 2Cm,$$

for absolute constants  $C, C' > 0$  makes this expression at most  $\delta/40$ , which gives us our overall bound that  $\Pr[\sum_{\ell=1}^m \|y^\ell\|_2^4 > C \log(1/\delta) \log^{2q-3}(m/\delta) \log^2 \log(m/\delta) + 2Cm] < \delta/20$ .

Plugging into (8), with probability at least  $1 - \delta/20$ ,

$$\begin{aligned} \|A\|_F^2 &= \frac{1}{m^2} \sum_{\ell=1}^m \|y^\ell\|_2^4 \\ &\leq \frac{C \log(1/\delta) \log^{2q-3}(m/\delta) \log^2 \log(m/\delta)}{m^2} + \frac{2c}{m}. \end{aligned}$$

Thus we have that, with probability at least  $1 - \delta/20$ ,

$$\|A\|_F = O(1/\sqrt{m} + \log^{1/2}(1/\delta) \log^{(2q-3)/2}(m/\delta) \log \log(m/\delta)/m).$$

□

**Lemma A.8.** Let  $a \in \mathbb{R}^n$ ,  $b \in \mathbb{R}^k$ , and  $x \in \mathbb{R}^{nk}$  be arbitrary vectors. Define  $X \in \mathbb{R}^{n \times k}$  to be  $x$  written as a matrix, such that  $X_{i,j} = x_{(i-1)k+j}$ . Then

$$\langle (a \otimes b), x \rangle = a^T X b.$$

*Proof.* We have that  $\langle (a \otimes b), x \rangle = \sum_{i=1}^n a_i \langle b^T X_{i,*} \rangle$ , where  $X_{i,*}$  is the  $i$ -th row of  $X$ . Note that the  $i$ -th element of vector  $Xb$  is  $\langle b^T X_{i,*} \rangle$ , and so  $a^T Xb = \sum_{i=1}^n a_i \langle b^T X_{i,*} \rangle$ . Thus  $\langle (a \otimes b), x \rangle = a^T Xb$ . □

**Lemma A.9.** Let  $A \in \mathbb{R}^{n \times n}$  and  $B \in \mathbb{R}^{n \times k}$  be arbitrary matrices and let  $x \in \mathbb{R}^{nk}$  be an arbitrary vector. Then  $\|(A \otimes B)x\|_2^2 = \|AXB^T\|_F^2$ , where  $X$  is  $x$  written as a matrix, such that  $X_{i,j} = x_{(i-1)k+j}$ .

*Proof.* It suffices to show a bijection between the entries of  $(A \otimes B)x$  and the entries of  $AXB^T$ . Note that the  $(i, j)$ -th entry of the matrix  $AXB^T$  is equal to  $\langle (A_{i,*} \otimes B_{j,*}), x \rangle$ , where  $A_{i,*}$  is the  $i$ -th row of  $A$  and  $B_{j,*}$  is the  $j$ -th row of  $B$ . The entry at position  $((i-1)k+j)$  in the vector  $(A \otimes B)x$  is also equal to  $\langle (A_{i,*} \otimes B_{j,*}), x \rangle$ , giving the bijection. □

## B Proof of Theorem 2.4

It suffices to show that, for any unit vector  $x \in \mathbb{R}^{n^q}$ ,

$$\Pr[|\|Tx\|_2^2 - 1| > \epsilon] \leq \delta. \quad (14)$$

To show (14), we use the following shown in the proof of Lemma 40 of [14].

**Lemma B.1.** (Proof of Lemma 40 of [14]) Let  $T^i : \mathbb{R}^{n'} \rightarrow \mathbb{R}^{t'}$  be a CountSketch matrix, where  $t' = O(\epsilon^{-2}/(q\delta))$ . Then for any fixed matrix  $X \in \mathbb{R}^{n' \times n}$ ,

$$\Pr[\|T^i X\|_F^2 = (1 \pm \epsilon)\|X\|_F^2] \geq 1 - \delta/q.$$

*Proof.* Lemma 40 of [14] shows that  $\mathbf{E}[\|T^i X\|_F^2] = \|X\|_F^2$  and  $\mathbf{Var}[\|T^i X\|_F^2] \leq \frac{6}{m} \|X\|_F^4$ . Applying Chebyshev's inequality, we have that

$$\Pr[|\|T^i X\|_F^2 - \|X\|_F^2| \geq \epsilon\|X\|_F^2] \leq \frac{6\|X\|_F^4}{t'\epsilon^2\|X\|_F^4},$$

and setting  $t' = 6q\epsilon^{-2}/(\delta)$  proves the lemma. □

500

We show (14) by applying Lemma B.1  $q$  times, each time with  $\epsilon$  replaced with  $\epsilon/(4q)$ . By Lemma A.9 we have that  $\|Tx\|_2^2 = \|T^1 X (T^2 \otimes T^3 \otimes \dots \otimes T^q)\|_F^2$ , where  $X \in \mathbb{R}^{n \times n^{q-1}}$  has its entries in one-to-one correspondence with the entries of  $x$ . By Lemma B.1,  $\|T^1 X (T^2 \otimes T^3 \otimes \dots \otimes T^q)\|_F^2 = (1 \pm \epsilon/(4q)) \|X (T^2 \otimes T^3 \otimes \dots \otimes T^q)\|_F^2$ . Now we replace  $X$  with the matrix  $X^1 \in \mathbb{R}^{n \times (t \cdot n^{q-2})}$  which has each of its columns  $X_{*,i}$  replaced with  $T^1 X_{*,i}$ . The entries of  $X^1$  are then in one-to-one correspondence with the entries of a vector  $x^1 \in \mathbb{R}^{t \times n^{q-1}}$ .

We now repeat the above argument with  $T^2$  replacing the role of  $T^1$  and  $X^1$  replacing the role of  $X$ . Applying Lemma B.1  $q$  times, and applying a union bound, we obtain a vector  $Tx \in \mathbb{R}^{t^q}$  with  $\|Tx\|_2^2 = 1 \pm \epsilon$  with probability at least  $1 - \delta$ . This proves (14).

Note that if the vector  $x$  is of the form  $x^1 \otimes x^2 \otimes \dots \otimes x^q$ , for  $x^i \in \mathbb{R}^n$  for  $i = 1, 2, \dots, q$ , then we can write  $Tx$  as

$$\begin{aligned} Tx &= T^1 \otimes T^2 \otimes \dots \otimes T^q (x^1 \otimes x^2 \otimes \dots \otimes x^q) \\ &= T^1 x^1 \otimes T^2 x^2 \otimes \dots \otimes T^q x^q \end{aligned}$$

Since each matrix  $T^i$  is a CountSketch matrix, computing  $T^i x^i$  takes  $O(\sum_{i=1}^q \text{nnz}(x^i))$  time, and additionally  $\text{nnz}(T^i x^i) \leq \text{nnz}(x^i)$  for each  $i = 1, 2, \dots, q$ .

### C Proof of Theorem 3.1

Consider a vector  $x \in \mathbb{R}^{n^q}$  defined as follows:  $x = y \otimes y \otimes \dots \otimes y$ , where  $y$  is a random sparse vector containing  $(1/q) \log(1/(4\delta))$  entries that are equal to 1 placed at uniformly random positions, and remaining entries equal to 0. Note that  $T^i$  perfectly hashes the  $(1/q) \log(1/(4\delta))$  ones in  $y$  with probability at least  $1 - \delta \cdot \Theta(\log^2(1/\delta)/q^2)$ . By a union bound, with probability at least  $1/2$ , simultaneously for  $i = 1, 2, \dots, q$ ,  $T^i$  perfectly hashes  $y$ . Thus, conditioned on this event which we call  $\mathcal{E}$ , each  $T^i y$  has exactly  $(1/q) \log(1/(4\delta))$  entries which are each equal to 1 or  $-1$ , and remaining entries are equal to 0. We condition on event  $\mathcal{E}$  in what follows.

Now consider the first row  $u^{1,1} \otimes u^{1,2} \otimes \dots \otimes u^{1,q}$  of the sketching matrix  $\sqrt{m} \cdot S$ . The first entry of  $\sqrt{m} S \cdot Tx$  is equal to  $\prod_{i=1}^q \langle u^{1,i}, T^i y \rangle$ . For each  $i = 1, 2, \dots, q$ , with probability  $(1/2)^{(1/q) \log(1/(4\delta))} = (4\delta)^{1/q}$ , each of the entries of  $u^{1,i}$  in the support of  $T^i y$  has the same sign. Thus, this holds for all  $i$  simultaneously with probability  $(4\delta)$  by independence of the  $u^{1,i}$ . Let us call this event  $\mathcal{F}$ . By independence of  $S$  and  $T$  it follows that  $\mathcal{E} \wedge \mathcal{F}$  occurs with probability at least  $(1/2) \cdot (4\delta) = 2\delta$ . In this case, we have that the squared first entry of  $\sqrt{m} \cdot S T x$  has value  $\Omega(\log^{2q}(1/\delta))$ , where we again used that  $q$  is a constant. Note that  $\|x\|_2^2 = (1/q)^q \log^q(1/(4\delta))$ , which for constant  $q$ , is a factor of  $\Theta(\log^q(1/\delta))$  smaller than the squared first entry of  $\sqrt{m} S \cdot Tx$  conditioned on  $\mathcal{E} \wedge \mathcal{F}$ .

We next consider  $\|(STx)_{-1}\|_2^2$ , which denotes the squared 2-norm of the vector  $STx$  with the first entry replaced with 0. Define the event  $\mathcal{G}$  that  $\|(STx)_{-1}\|_2^2 = (1 \pm C/\sqrt{m})\|x\|_2^2$  for a constant  $C > 0$  defined below, where  $C$  may depend on  $q$  but is constant for constant  $q$ , as we assume.

We will show that  $\Pr[\mathcal{G} \mid \mathcal{E} \wedge \mathcal{F}] \geq 1/2$ . We will then have that  $\Pr[\mathcal{E} \wedge \mathcal{F} \wedge \mathcal{G}] \geq \frac{1}{2} \cdot 2\delta = \delta$ . Since the first rows of  $S$  are independent,  $\Pr[\mathcal{G} \mid \mathcal{E} \wedge \mathcal{F}] = \Pr[\mathcal{G} \mid \mathcal{E}]$ , which we now bound.

Note this will imply a lower bound of  $m = \Omega(\epsilon^{-1} \log^q(1/\delta))$ , since it implies that with probability at least  $\delta$ ,

$$\|STx\|_2^2 = (\Omega(\log^{2q}(1/\delta))/m + 1 \pm 10/\sqrt{m})\|x\|_2^2.$$

Since  $m \geq 10000/\epsilon^2$  by our  $m = \Omega(\epsilon^{-2} \log(1/\delta))$  lower bound, and assuming  $\delta$  is smaller than a sufficiently small constant, it follows that with probability at least  $\delta$ ,

$$\|STx\|_2^2 = (\Omega(\log^q(1/\delta))/m + 1 \pm \epsilon/10)\|x\|_2^2. \quad (15)$$

In order for  $\|STx\|_2^2 = (1 \pm \epsilon)\|x\|_2^2$  with probability at least  $1 - \delta$ , we must therefore have  $m = \Omega(\epsilon^{-1} \log^q(1/\delta))$ , which shows the lower bound.

Thus, it remains to show that  $\Pr[\mathcal{G} \mid \mathcal{E}] \geq 1/2$ . Note that  $\|Tx\|_2 = \|x\|_2$  given that event  $\mathcal{E}$  occurs, and more precisely  $\|T^i y\|_2 = \|y\|_2$  for each  $i = 1, \dots, q$ , so it suffices to compute the probability that  $S$  preserves the norm of  $Tx = T^1 y \otimes T^2 y \otimes \dots \otimes T^q y$ . For the  $\ell$ -th row  $u^{\ell,1} \otimes u^{\ell,2} \otimes \dots \otimes u^{\ell,q}$  of  $S$ , we have  $\sqrt{m}(STx)_\ell = \prod_{i=1}^q \langle u^{\ell,i}, T^i y \rangle$ . Define  $z_\ell = \prod_{i=1}^q \langle u^{\ell,i}, T^i y \rangle$ .



544 Since the  $u^{\ell,i}$  are independent for  $i = 1, 2, \dots, q$ , we have

$$\begin{aligned}\mathbf{E}[z_\ell^2] &= \prod_{i=1}^q \mathbf{E}[\langle u^{\ell,i}, T^i y \rangle^2] \\ &= \prod_{i=1}^q \|T^i y\|_2^2 = \prod_{i=1}^q \|y\|_2^2 = \|x\|_2^2.\end{aligned}\tag{16}$$

545 Consequently,  $\mathbf{E}[\|(STx)_{-1}\|_2^2] = \frac{m-1}{m} \|x\|_2^2$ .

546 We can similarly bound the second moment,

$$\mathbf{E}[z_\ell^4] = \prod_{i=1}^q \mathbf{E}[\langle u^{\ell,i}, T^i y \rangle^4],\tag{17}$$

547 where we have again used independence of the  $u^{\ell,i}$  for  $i = 1, 2, \dots, q$ . Note that  $\mathbf{E}[\langle u^{\ell,i}, T^i y \rangle^4]$  is  
548 just the second moment of the standard Alon-Matias-Szegedy [5] estimator (using a random sign  
549 vector  $u^{\ell,i}$ ) for the squared 2-norm of a fixed vector (in this case  $T^i y$ ), and it holds (see the proof of  
550 Theorem 2.2 of [5]),

$$\mathbf{E}[\langle u^{\ell,i}, T^i y \rangle^4] \leq \|T^i y\|_4^4 + 6\|T^i y\|_2^4 \leq 7\|T^i y\|_2^4.\tag{18}$$

551 Plugging (18) into (17), we get

$$\begin{aligned}\mathbf{E}[z_\ell^4] &\leq 7^q \prod_{i=1}^q \|T^i y\|_2^4 \\ &= 7^q \left(\prod_{i=1}^q \|T^i y\|_2^2\right)^2 = 7^q \|x\|_2^4.\end{aligned}\tag{19}$$

552 Consequently by (19),  $\mathbf{Var}[z_\ell^4] \leq 7^q \|x\|_2^4$ , and by independence of  $\ell = 2, 3, \dots, m$ ,  
553  $\mathbf{Var}[\|(STx)_{-1}\|_2^2] \leq \frac{1}{m-1} \cdot 7^q \|x\|_2^4$ . Combining with (16), we can apply Chebyshev's inequality  
554 to conclude that

$$\begin{aligned}\Pr[\| (STx)_{-1} \|^2 - \|x\|_2^2 > \gamma \|x\|_2^2] \\ \leq \frac{7^q \|x\|_2^4}{(m-1)\gamma^2 \|x\|_2^4} = \frac{7^q}{(m-1)\gamma^2}.\end{aligned}\tag{20}$$

555 It follows from (20) that for constant  $q$  and  $\gamma = \Theta(1/\sqrt{m})$ , this probability is at least  $1/2$ . Here we  
556 can take the constant  $C$  defined above to be  $2 \cdot 7^{q/2}$ , for example. Thus,  $\Pr[\mathcal{G} \mid \mathcal{E}] \geq 1/2$ , which  
557 completes the proof.

## 558 D Note on Previous Analysis of Sketch

Given  $Sx$  and  $Sy$  for  $x, y \in \mathbb{R}^{n^q}$ , it is not hard to show that  $\mathbf{E}[\langle Sx, Sy \rangle] = \langle x, y \rangle$ . The main issue is the variance of this sketch. Indeed, as stated in [34], this estimate ‘‘incurs very large variance, especially for large  $q$ ’’. Kar and Karnick analyze the variance of this sketch and show the following (discussion before Section 4.1 of [34]). Suppose one has a set  $\Omega$  of points of the form  $a^{\otimes q}$  for some  $a \in \mathbb{R}^n$  (the different points in  $\Omega$  may be tensor products of different points  $a \in \mathbb{R}^n$ ), for which each such point  $a$  is in the radius- $R$   $\ell_1$ -ball  $B_1(0, R)$ . Let  $C_\Omega = q(qR^2)^q$ . Then if  $m = \Omega(C_\Omega^2 \epsilon^{-2} \log(1/\delta))$ , then for any  $x, y \in \Omega$ ,

$$\Pr[|\langle Sx, Sy \rangle - \langle x, y \rangle| > \epsilon] \leq \delta.$$

559 For  $a = (1/\sqrt{n}, \dots, 1/\sqrt{n})$ , we have  $\|a^{\otimes q}\|_2 = 1$  but  $\|a^{\otimes q}\|_1 = n^{q/2}$ . Consequently, to apply their  
560 analysis we would need to set  $R = n^{1/2}$  in their bound, which gives  $C_\Omega = n^{2q}$  and a sketching  
561 dimension  $m = \Omega(n^{2q} \epsilon^{-2} \log(1/\delta))$  which is much larger than the dimension  $n^q$  of  $a^{\otimes q}$  to begin  
562 with!
